# Supplementary material for: Transcriptomic and Metabolomic Studies Reveal Mechanisms of Effects of CPPU-Mediated Fruit-Setting on Attenuating Volatile Attributes of Melon Fruit
Source: MDPI journal article supplement (doi:10.3390/agronomy11051007), 2021-05-19
Supplement: s1 [file s1]

## Gene expression level detection related primers

| Primer          | Nucleotide sequence(5'-3') | Gene function                               |
|-----------------|----------------------------|---------------------------------------------|
| LOC103495152-qF | GCACCGTACGATAGTATCAACG     | abscisic acid receptor PYL4                 |
| LOC103495152-qR | TTGAGTTTTTCGCGTCGTAGGTGG   |                                             |
| LOC103482579-qF | CCTCCATGTGTAAAGCTTGCCAC    | ethylene-responsive transcription factor    |
| LOC103482579-qR | GAATGCGAGGATCAAGGGCTT      | 1A-like                                     |
| LOC103490329-qF | GAGGACCTTGTTCTTAAACCC      | auxin-responsive protein SAUR36-like        |
| LOC103490329-qR | TGGAGGAAGAAGGCTCGAGTCA     |                                             |
| LOC103501008-qF | GAGACAGAGCTCCGTCTTGGG      | auxin-responsive protein IAA16              |
| LOC103501008-qR | CAGTCACCGACGGCACTCTTC      |                                             |
| LOC103482831-qF | CCTGCTGACAACTGGGTGGA       | auxin response factor 9                     |
| LOC103482831-qR | CGGGTTTGAGTAGTAACAGCATG    |                                             |
| LOC103494899-qF | CCTTTACAAGCCACTCTTGAC      | basic form of pathogenesis-related protein  |
| LOC103494899-qR | GGATAAAAGACTGCGCCTTGG      | 1-like                                      |
| LOC103492391-qF | TAAACTAGCCCCGGGATATCGG     | ethylene-responsive transcription factor    |
| LOC103492391-qR | CGCCGTTGACACTTCCGATTCA     | ERF017-like                                 |
| LOC103503255-qF | CCAACCCTCGATTCTACAGCG      | probable indole-3-acetic acid-amido         |
| LOC103503255-qR | CTCTACATCTACCAGGTCGACG     | synthetase GH3.1                            |
| LOC103494980-qF | GCATTGTTCTTGAACCCTGCCAC    | indole-3-acetic acid-amido synthetase       |
| LOC103494980-qR | GAAGCCGATGTGTAAACCAGGG     | GH3.6                                       |
| LOC103486594-qF | AAGATTCGACGGTACTACTCCGG    | ethylene-responsive transcription factor 8  |
| LOC103486594-qR | GATACGCGGCGGAGATTAGAGA     |                                             |
| LOC103496155-qF | CCGCGAGCGAAGCTTAATTTTC     | ethylene-responsive transcription factor    |
| LOC103496155-qR | TCCAATACTGGCGGAATCCGAC     | ERF109                                      |
| LOC103501853-qF | CAGATGACGAATCGGAGTCGCT     | ethylene-responsive transcription factor 4  |
| LOC103501853-qR | GCAGTAGTAGTCCCAGCCACAG     |                                             |
| melon actin-F   | CAAGGGCCGTCTTCCCTAGC       | Primers used for amplification of the actin |
| melon actin-R   | GCTTTGGGATTGAGTGGTGC       | gene in quantitative real-time PCR          |
